# Supplementary material for: Prognostic factors for survival in patients with metastatic lung adenocarcinoma: An analysis of the SEER database
Source: PubMed Central journal article supplement (PMC7606019; doi:10.1111/1759-7714.13681), 2020-09-28
Supplement: TCA-11-3357-s001.pdf [file TCA-11-3357-s001.pdf]

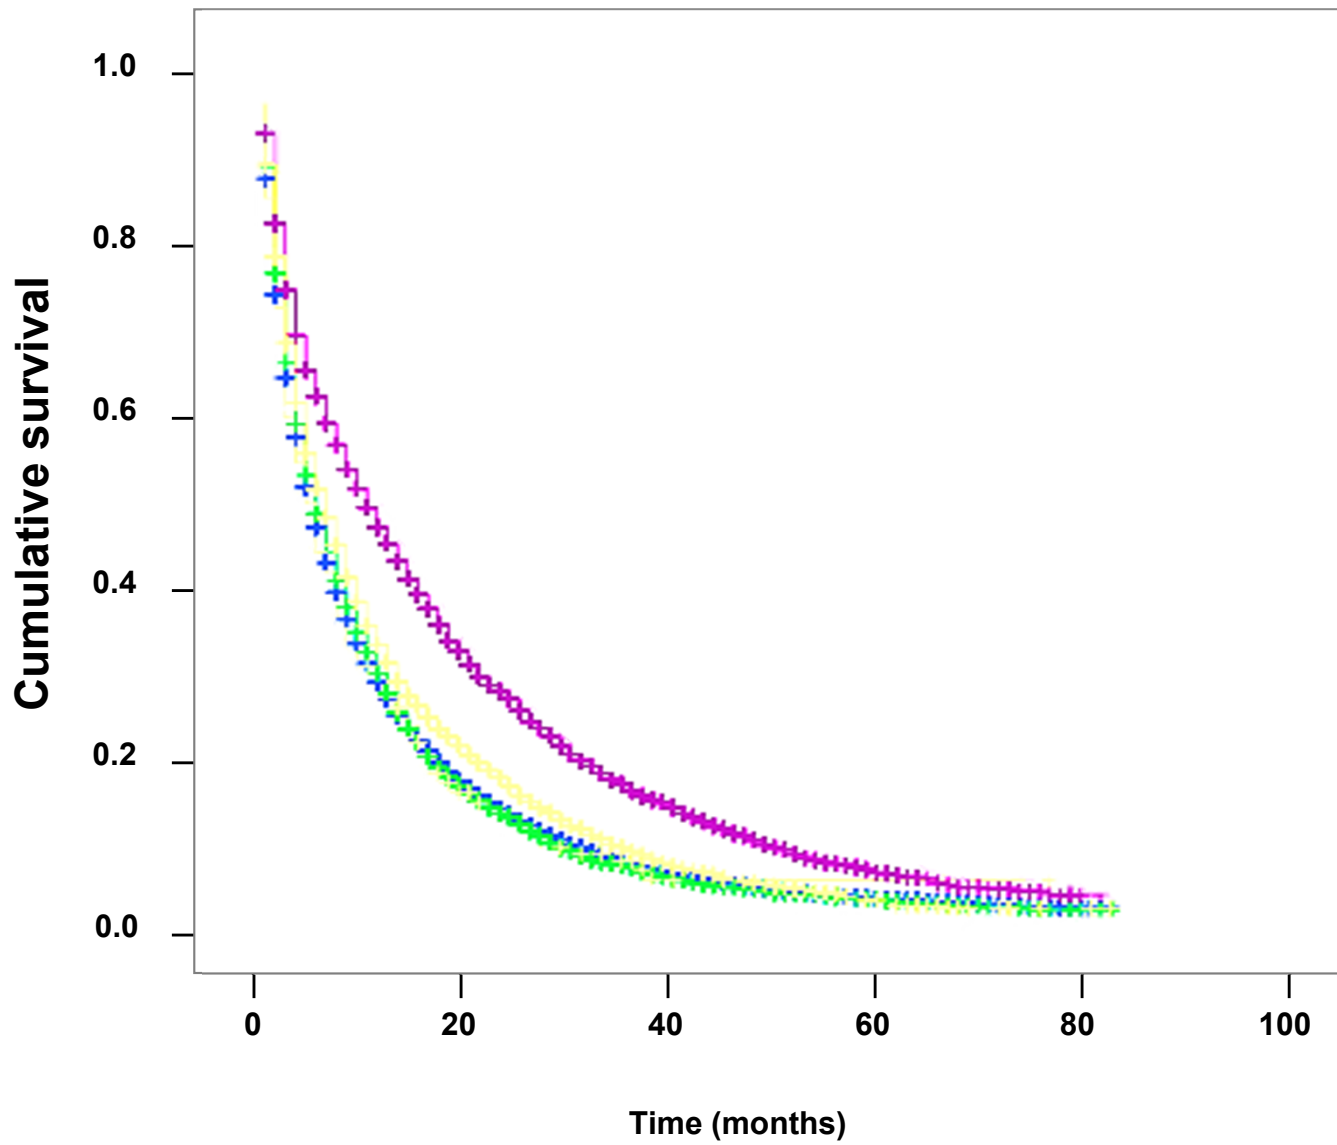

| Race/ethnicity         | mOS (months) | 95% CI      |
|------------------------|--------------|-------------|
| White, non-Hispanic    | 6.00         | 5.89-6.11   |
| Black, non-Hispanic    | 6.00         | 5.74-6.26   |
| Asian/Pacific Islander | 11.00        | 10.37-11.63 |
| Hispanic               | 7.00         | 6.52-7.48   |
| Indian/Alaska Native   | 5.00         | 3.70-6.30   |

Supplementary Fig. S1

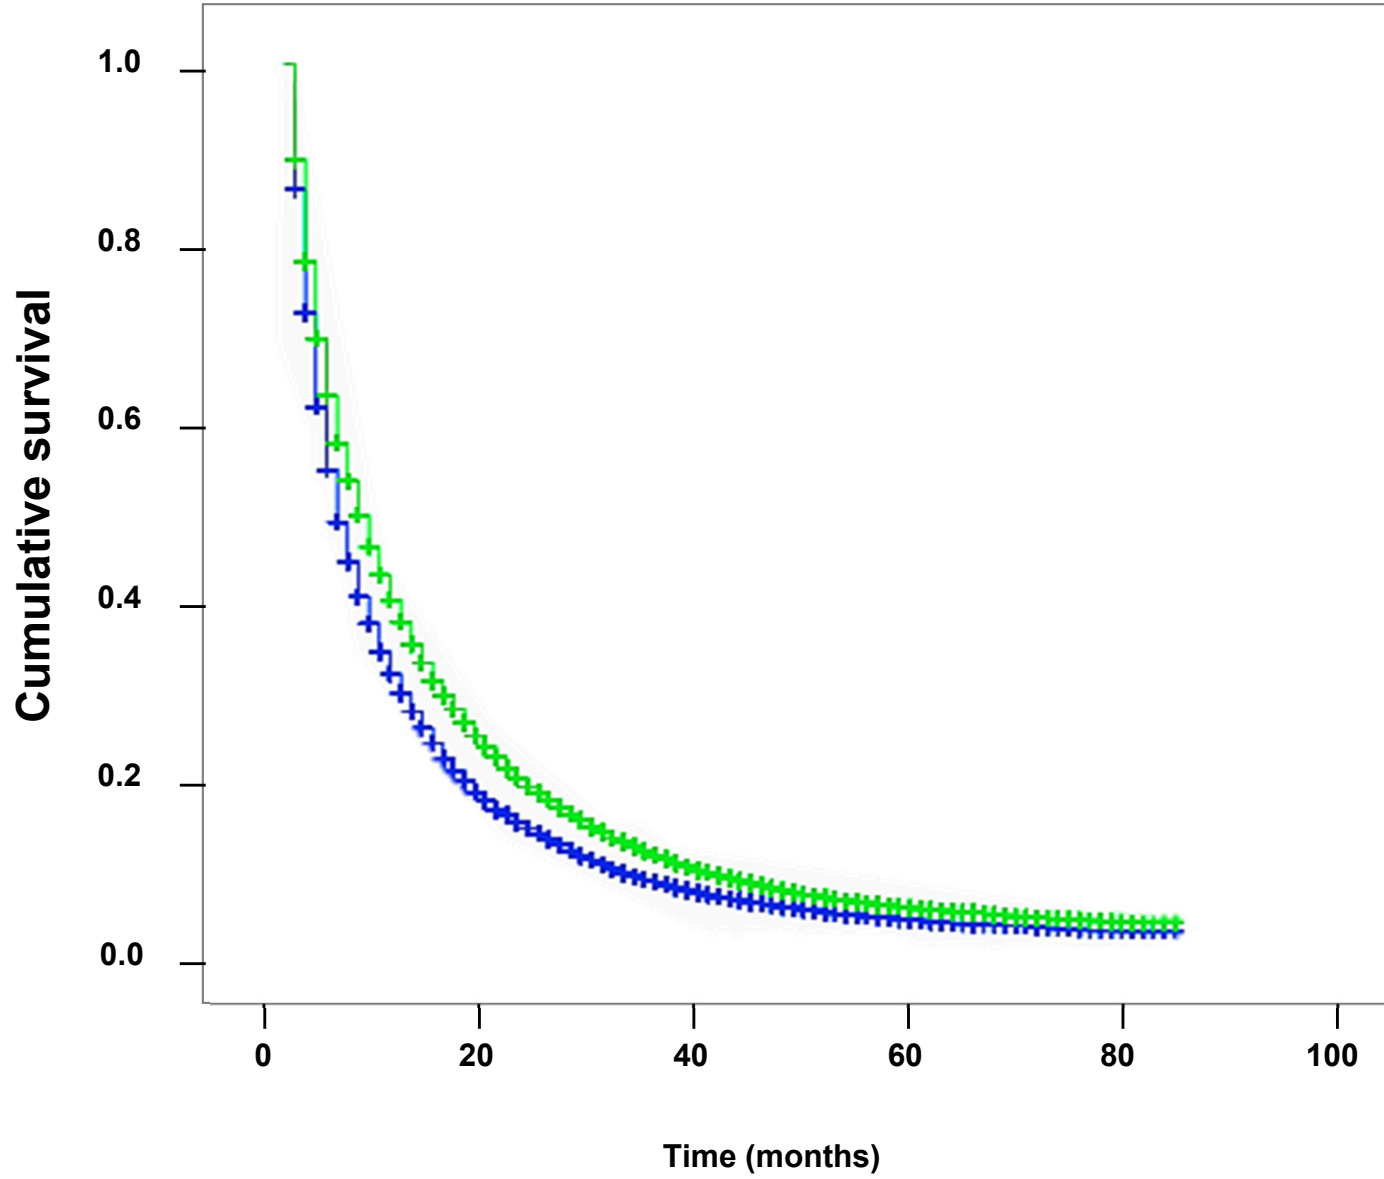

| Living arrangements | mOS (months) | 95% CI    |
|---------------------|--------------|-----------|
| Alone               | 5.00         | 4.88-5.12 |
| With others         | 7.00         | 6.83-7.17 |

Supplementary Fig. S2

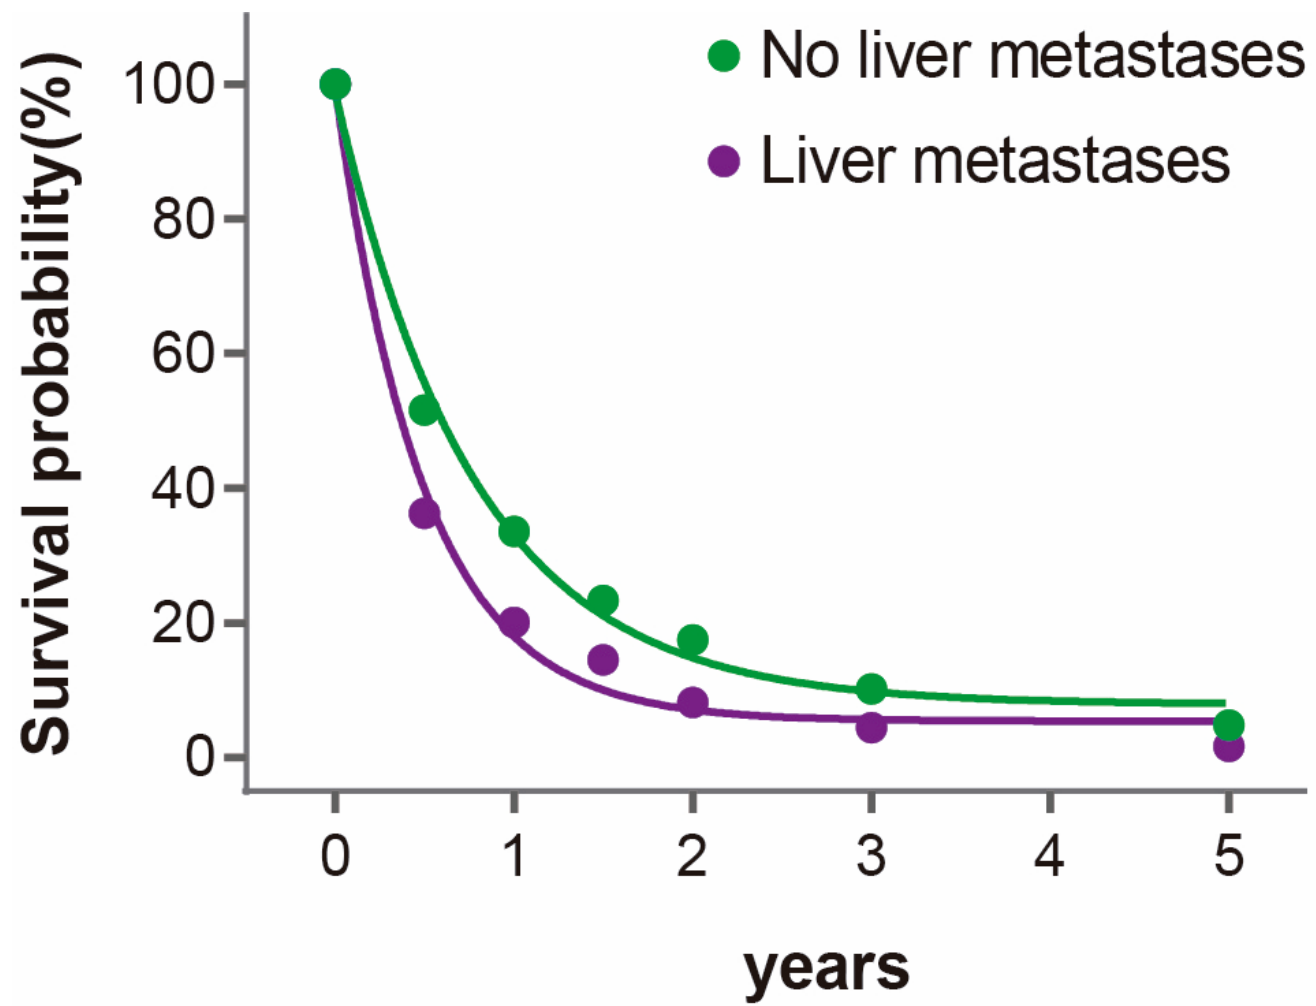

Supplementary Fig. S3
